# Supplementary material
Source: PubMed Central journal article supplement (PMC4309553)
Supplement: NIHMS437459-supplement-Supp_Fig_S1-S5.pdf [file NIHMS437459-supplement-Supp_Fig_S1-S5.pdf]

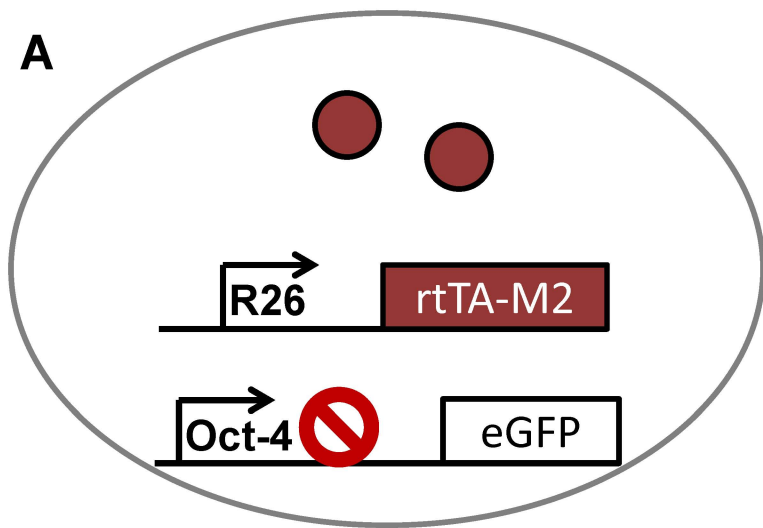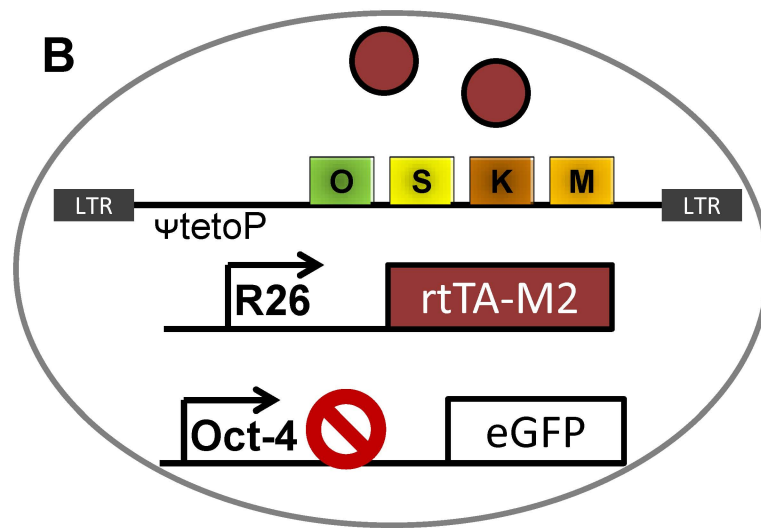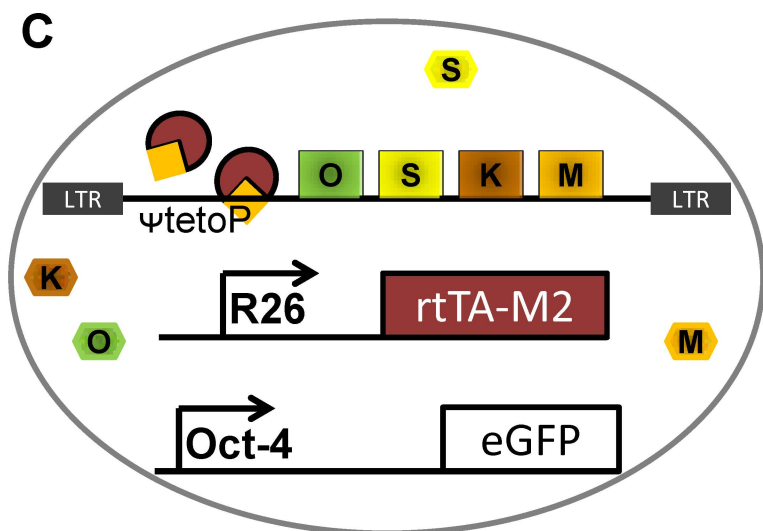

Add Dox ■

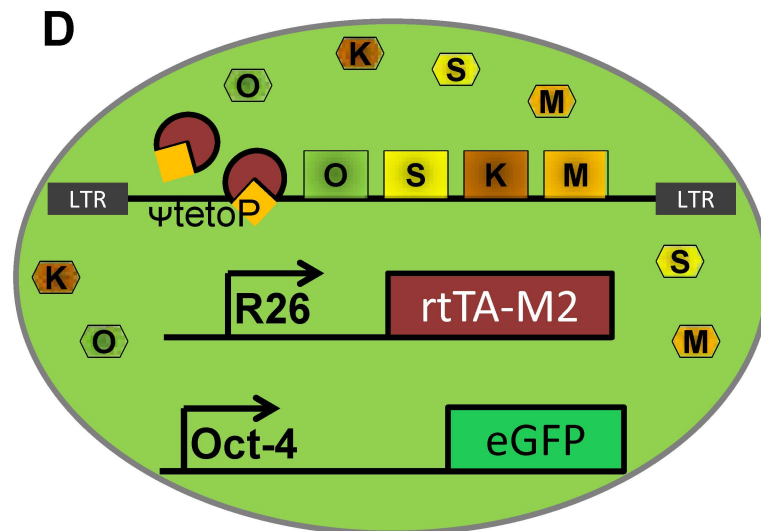

Rare reprogramming events

Fig S1

**Day 0**

**Plate on MEF and add Dox. Imaging starts.**

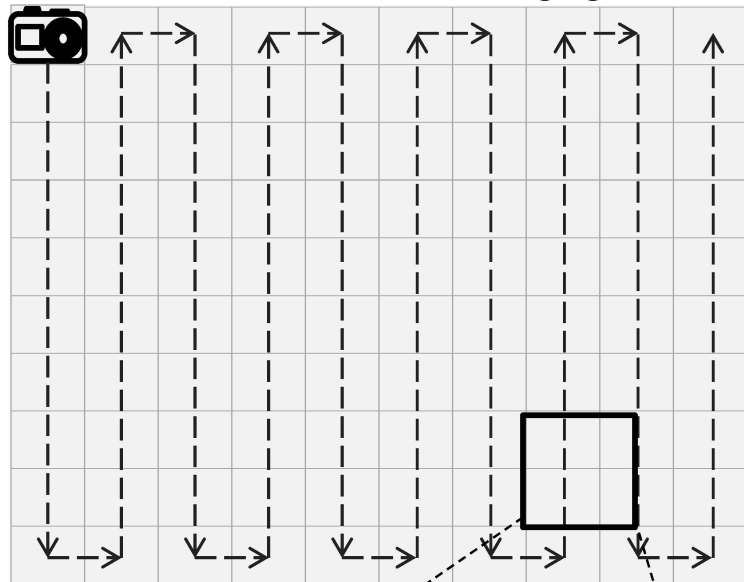

Every 5-30 min  
DIC, GFP, RFP

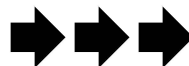

**Day 3-5**

**Imaging stops. Data analysis.**

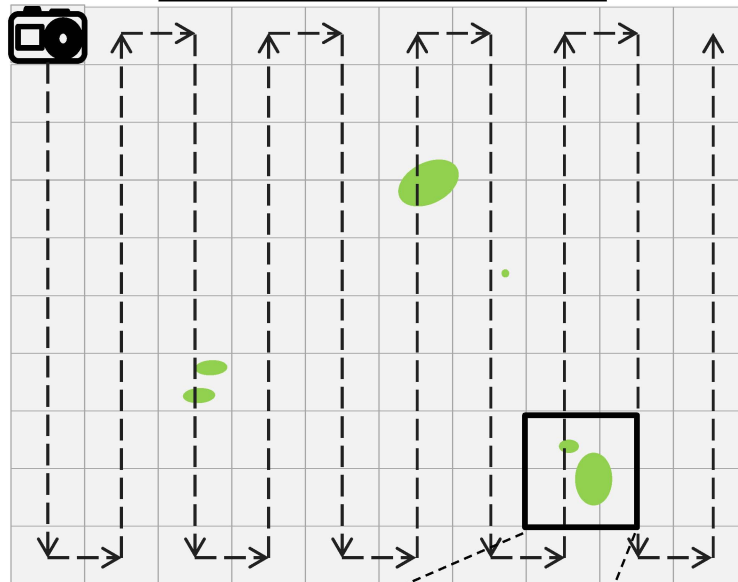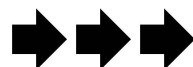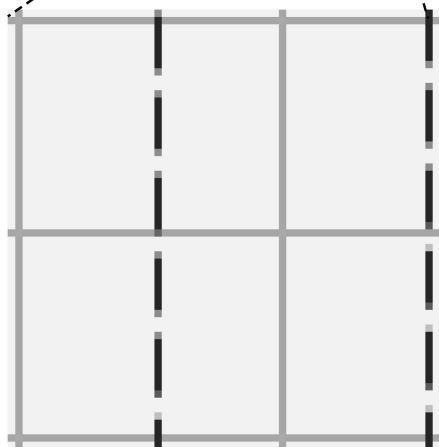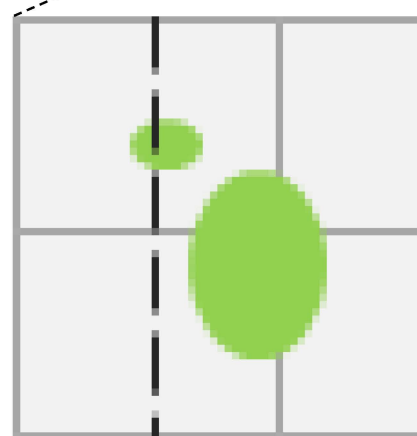

**Fig S2**

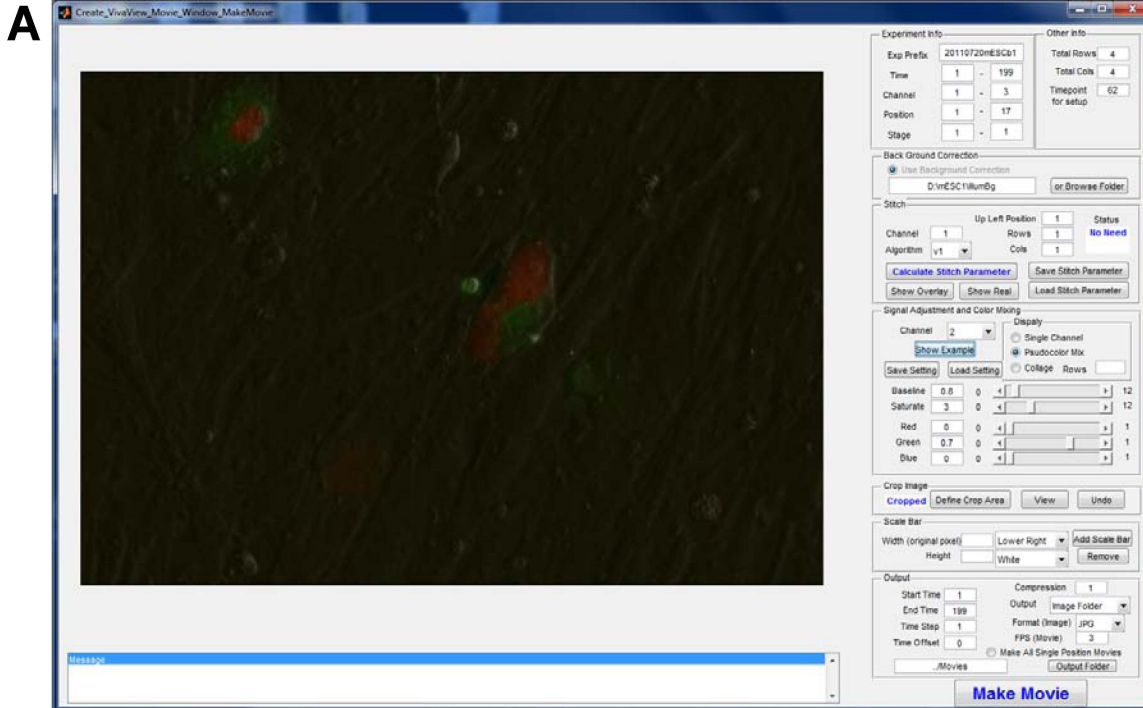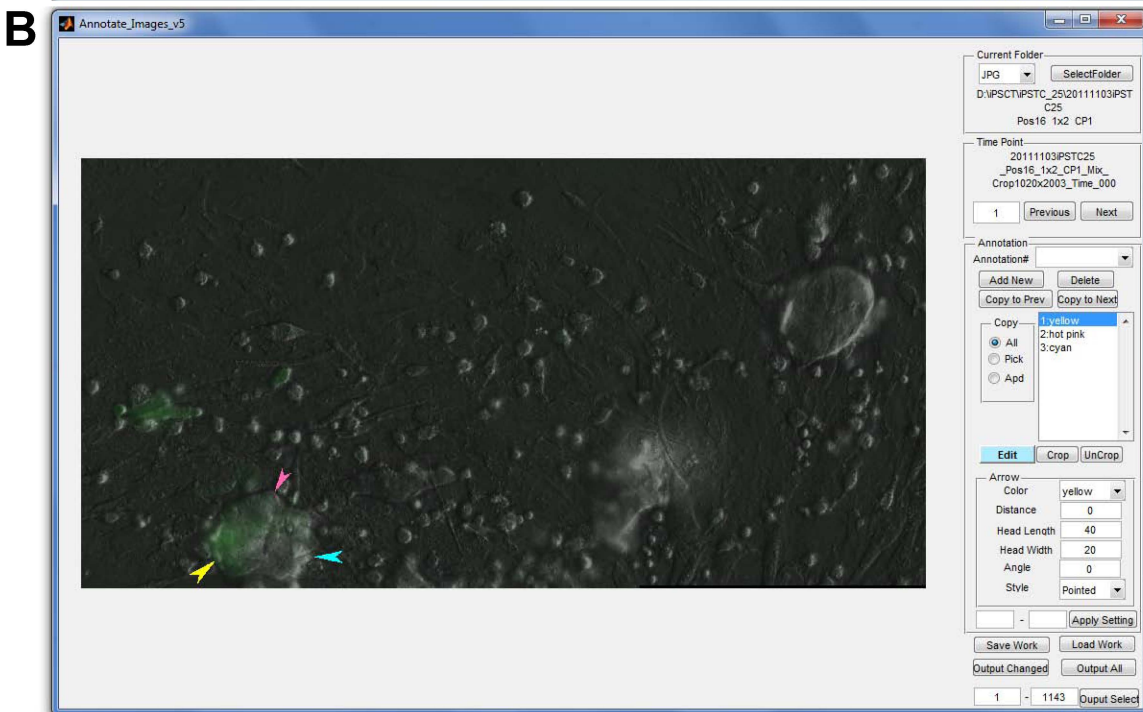

**Fig S3**

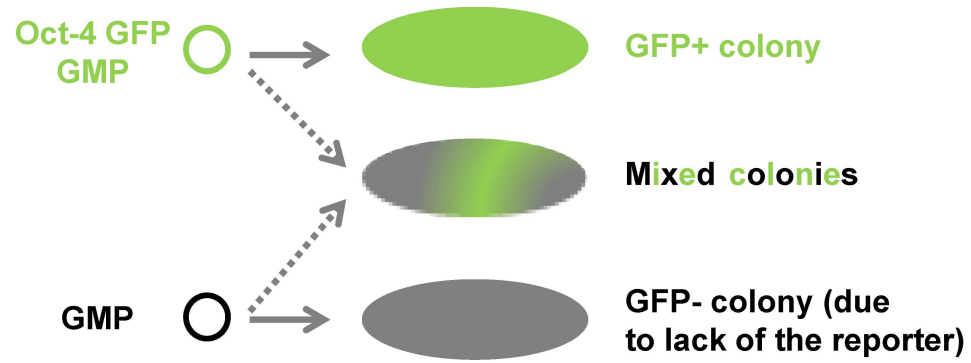

**Fig S4**

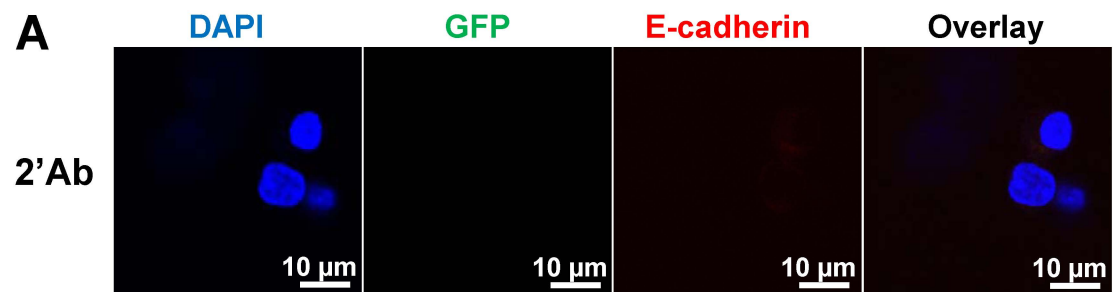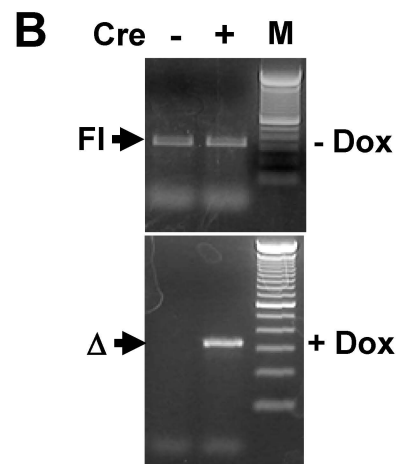

Fig S5
